# Supplementary material
Source: PubMed Central journal article supplement (PMC9346498)
Supplement: EMBR-23-e54234-s002.pdf [file EMBR-23-e54234-s002.pdf]

## Expanded View Figures

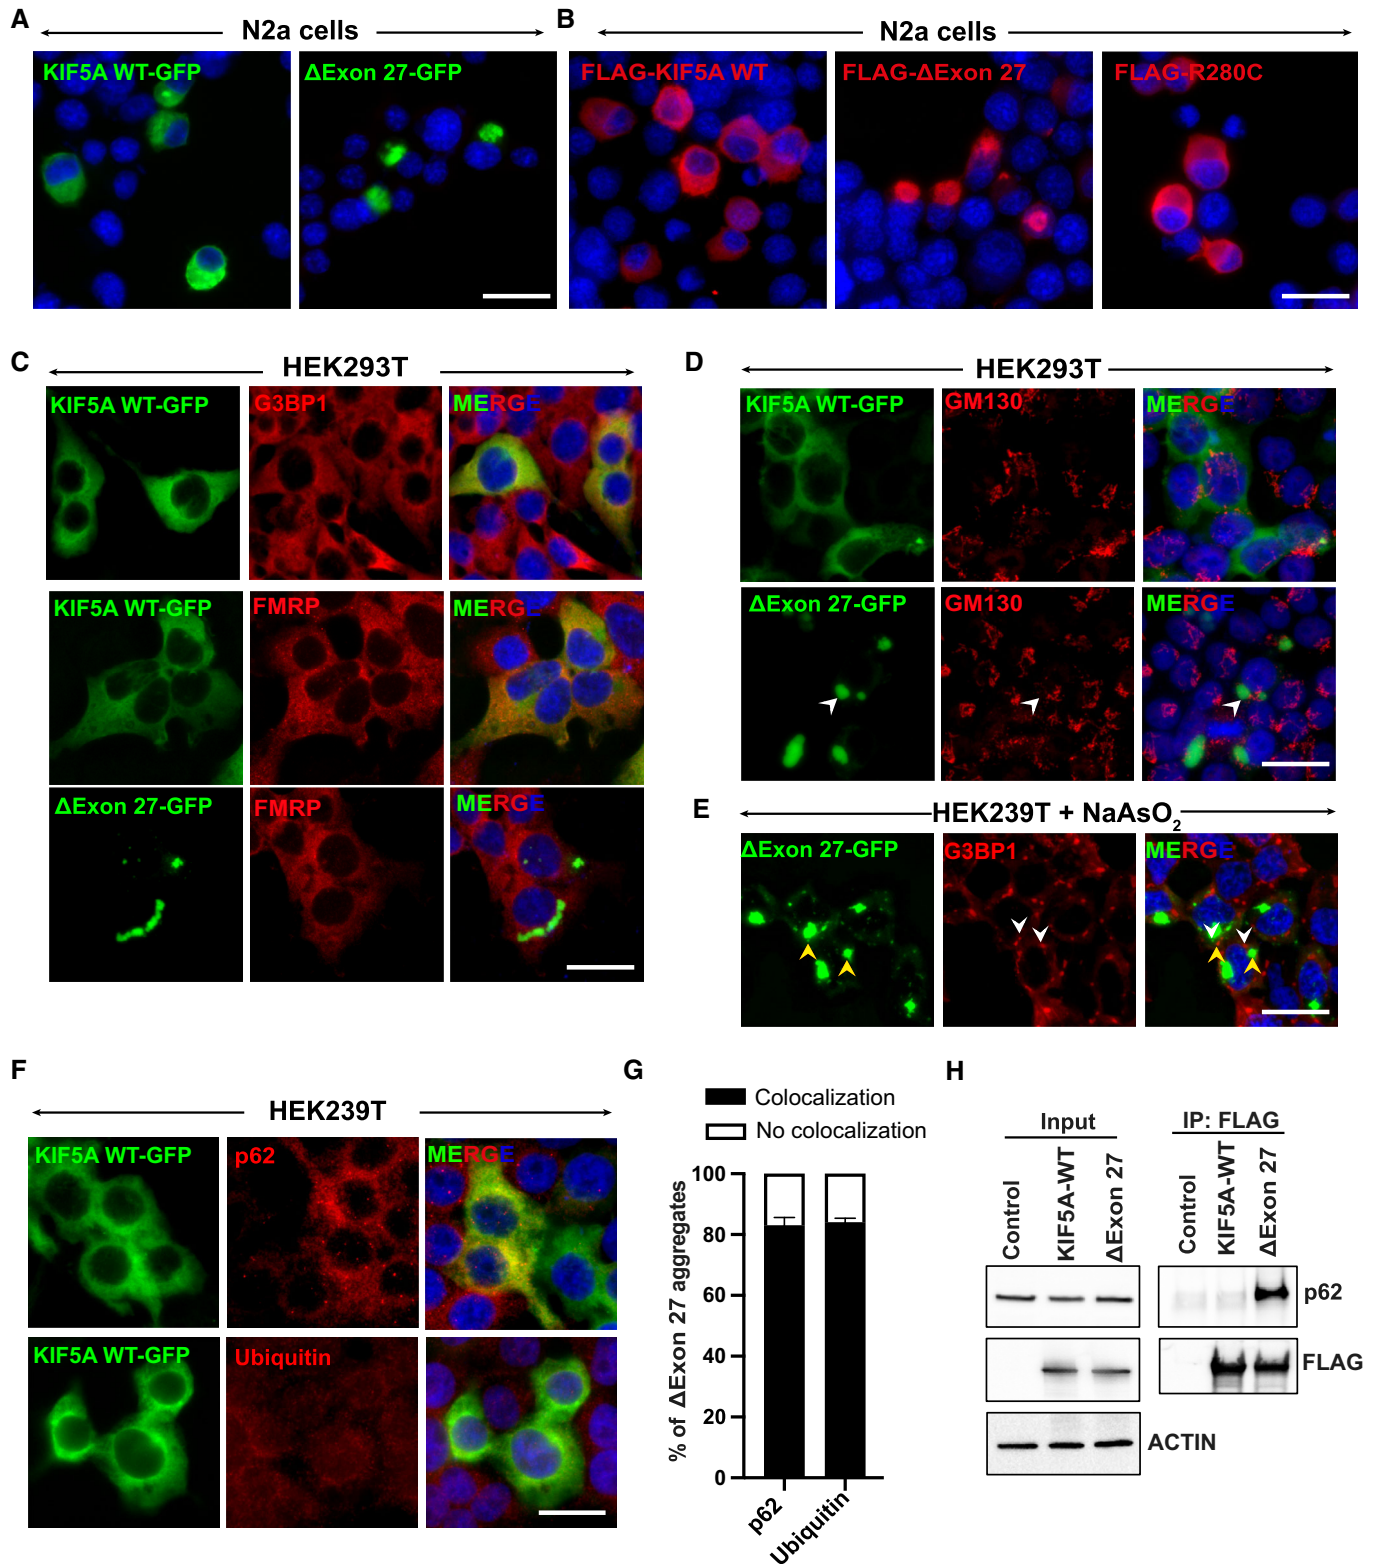

Figure EV1.

**Figure EV1. KIF5A  $\Delta$ Exon27 is prone to form cytoplasmic aggregates.**

- A, B Expression of human KIF5A WT and disease-associated mutants with C-terminal GFP (A) or N-terminal FLAG (B) tags in N2a cells. Scale bar: 20  $\mu$ m.
- C Colocalization of G3BP1 and FMRP, markers of stress granules, with KIF5A WT or  $\Delta$ Exon27 expressed in HEK293T cells. Scale bar: 20  $\mu$ m.
- D GM130 (a Golgi marker) staining in HEK293T cells expressing either KIF5A WT or  $\Delta$ Exon27. Scale bar: 20  $\mu$ m.
- E G3BP1 staining in HEK293T cells expressing  $\Delta$ Exon27 and treated with sodium arsenite (200  $\mu$ M) for 30 min. White and yellow arrowheads highlight stress granules and  $\Delta$ Exon27 aggregates respectively. Scale bar: 20  $\mu$ m.
- F p62 and ubiquitin staining in KIF5A WT expressing HEK293T cells. Scale bar: 20  $\mu$ m.
- G Percent of cells with p62 and ubiquitin colocalized with cytoplasmic  $\Delta$ Exon27 granules. Bars indicate mean  $\pm$  SD.
- H Immunoprecipitation of KIF5A using antibodies against the N-terminal FLAG tag also pulled down endogenous p62 only in cells expressing  $\Delta$ Exon27, but not WT KIF5A. Three biological replicates,  $n = 200$  cells per experiment.

**Figure EV2. KIF5A  $\Delta$ Exon27 accumulates at the plus-ends of microtubules.**

- A Staining of TDP-43 in HEK293T cells expressing either KIF5A WT or  $\Delta$ Exon27 showed nuclear TDP-43. Three biological replicates,  $n = 200$  cells per experiment. Scale bar: 20  $\mu$ m.
- B Western blot detecting KIF5A expression with transient transfection and lentiviral transduction. Two biological replicates.
- C  $\Delta$ Exon27 expressed in HEK293T cells via lentiviral transduction forms small aggregates that colocalize with p62 (white arrowhead). Two biological replicates. Scale bar: 20  $\mu$ m.
- D Colocalization of p62 with KIF5A  $\Delta$ Exon27 granules. Scale bar: 20  $\mu$ m.
- E Mitochondria distribution in primary cortical neurons expressing KIF5A WT or  $\Delta$ Exon27. Scale bar: 20  $\mu$ m.
- F Expression of KIF5A WT-mApple and  $\Delta$ Exon27-mApple in LLC-PK1 cells stably expressing tubulin-GFP. KIF5A  $\Delta$ Exon27 shows aggregates at proximal tubule regions as highlighted by the white arrowhead. Scale bar: 20  $\mu$ m.
- G  $\Delta$ Exon27 expressed in LLC-PK1 cells shows aggregates that colocalize with microtubule plus-end-tracking protein EB1 at the proximal extrusions. Three biological replicates,  $n = 30$  cells per experiment. Scale bar: 20  $\mu$ m.

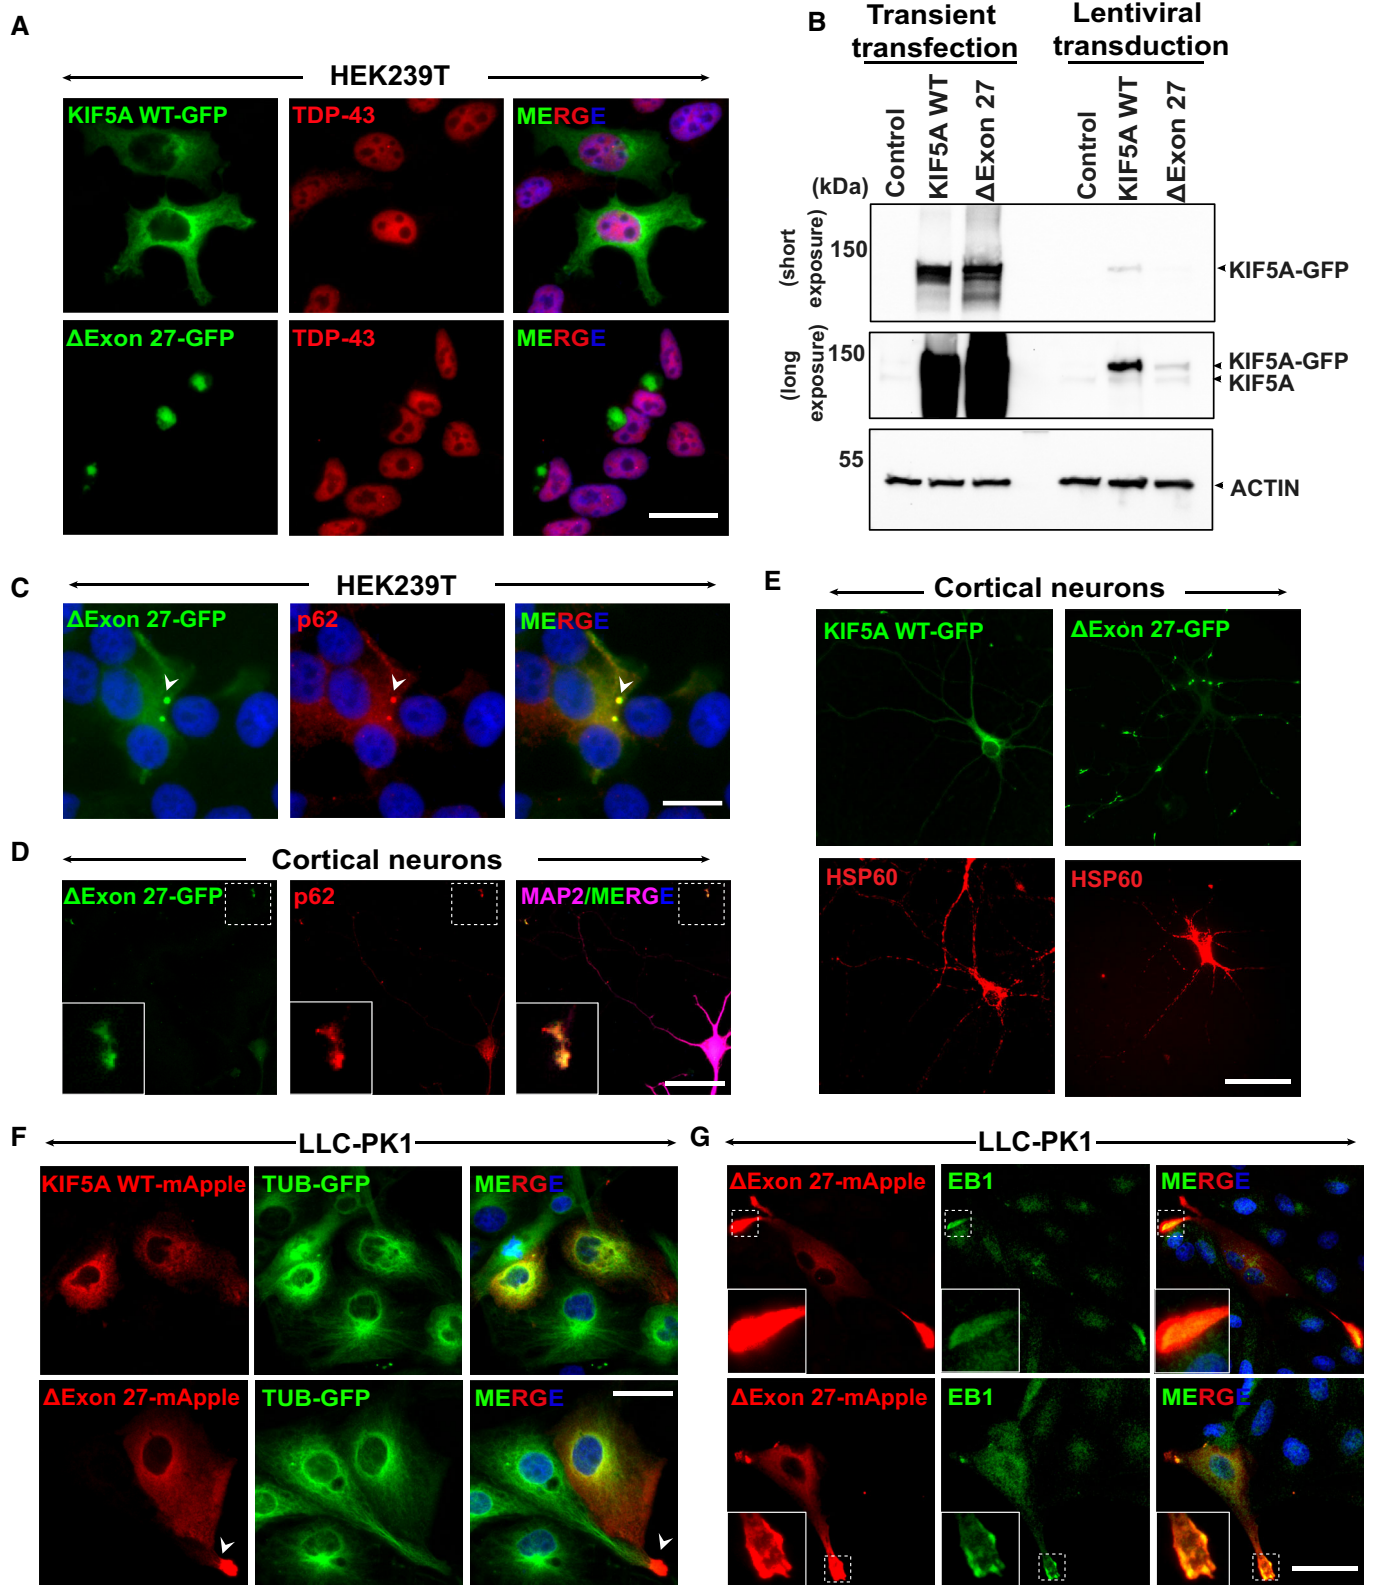

Figure EV2.

**Figure EV3. Motile properties of KIF5A  $\Delta$ Exon27 and characterization of truncation mutants K998 and  $\Delta$ C.**

- A Schematic illustrations of KIF5A truncation mutants, K998 and  $\Delta$ C.
- B Both KIF5A K998 and  $\Delta$ C truncated proteins diffuse in the cytoplasm when expressed in HEK293T and N2a cells. Two biological replicates,  $n = 100$  cells per experiment. Scale bar: 20  $\mu$ m.
- C Motor landing rate of KIF5A  $\Delta$ Exon27 along the microtubule was assessed.  $\Delta$ Exon27 does not have a preference over the landing location on microtubules.
- D Motor velocities (middle) and run-lengths (right) were determined based on kymographs (example on the left) for KIF5A WT and  $\Delta$ Exon27 complexes. HEK293T cells were transfected with both KIF5A WT-GFP and  $\Delta$ Exon27-mApple. The movements of WT and  $\Delta$ Exon27 were assessed by tracking either GFP or mApple, respectively. The right kymograph in D is the overlay of the GFP and mApple of moving WT-GFP/ $\Delta$ Exon27-mApple complexes. The x-axis scale for the processivity graphs was limited to 20  $\mu$ m to permit a direct comparison of the run-lengths of the different constructs. Diagonal lines in the kymograph represent KIF5A molecules moving over time. The velocity data were fit with Gaussian distribution and the processivity data were fit with an exponential decay function. The depicted scale bars for all kymographs shown in this figure is 5  $\mu$ m (horizontal line) and 10 s (vertical line). The measured values for the velocities and run-lengths are listed in Table 1.

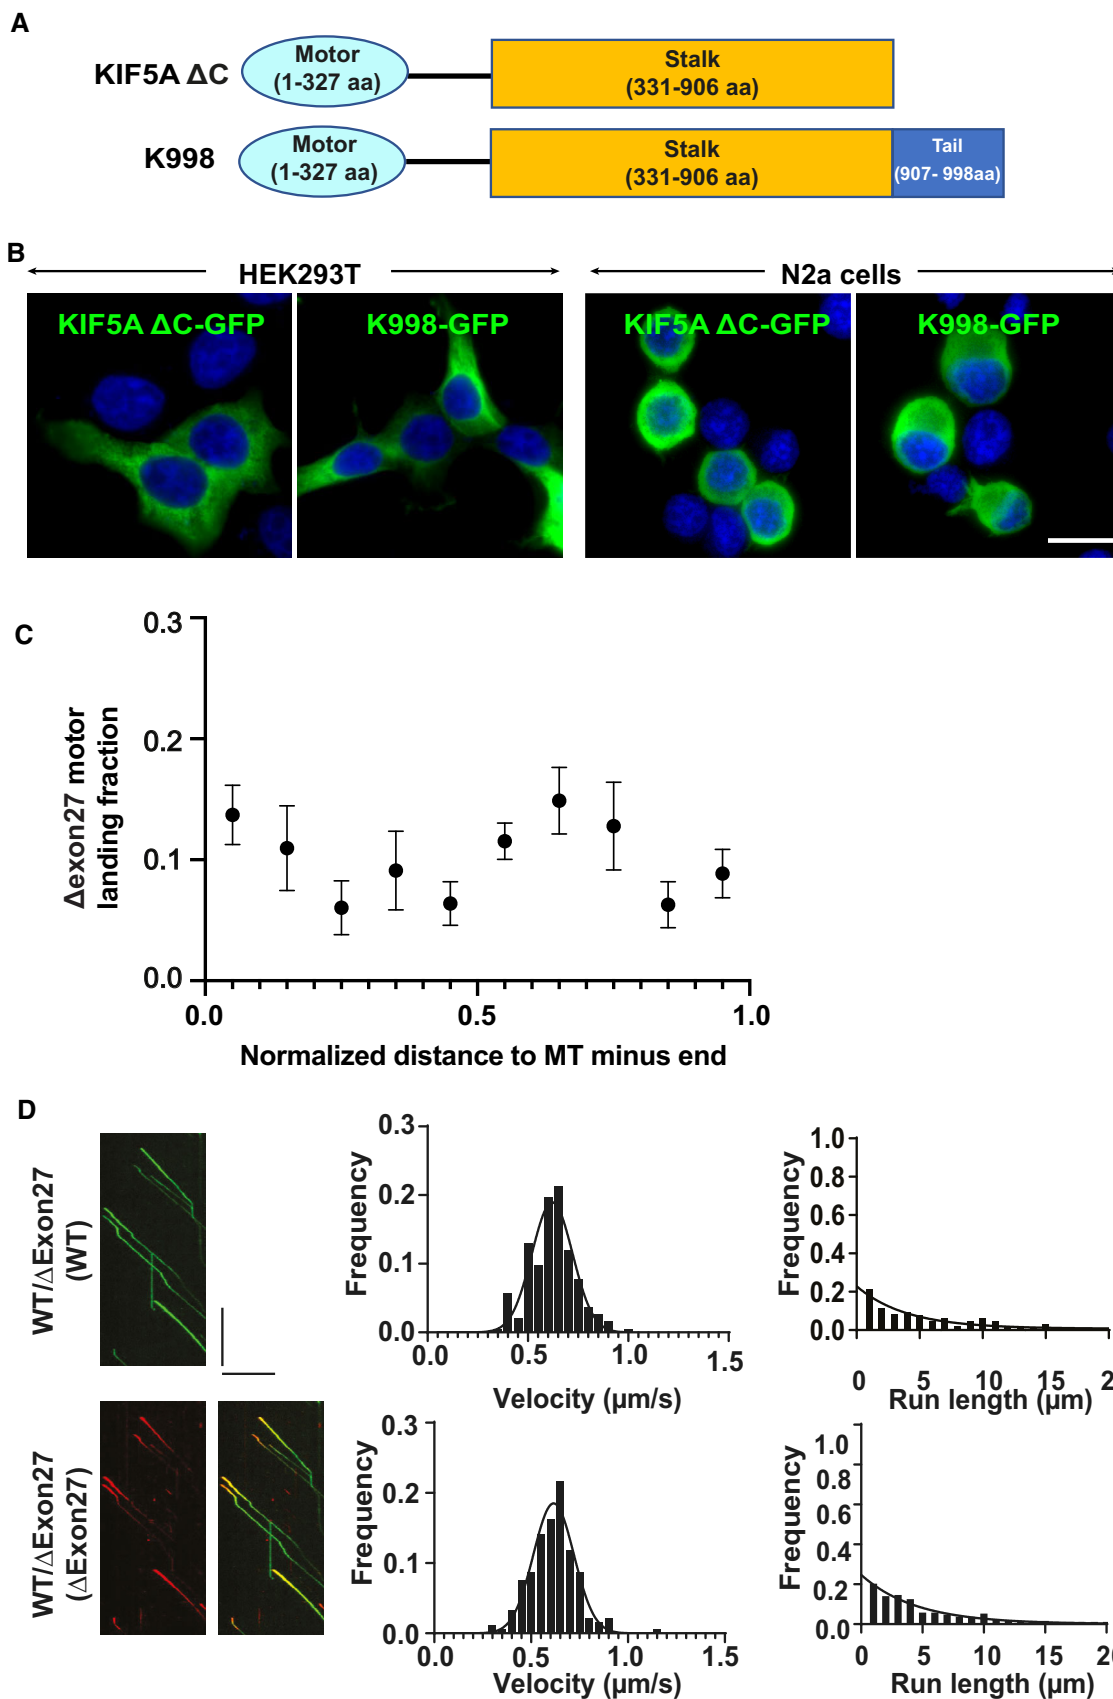

Figure EV3.

**Figure EV4. Enhanced motor self-association in KIF5A  $\Delta$ Exon27.**

- A Histograms of the measured fluorescence intensities of the various moving kinesin motors. The fluorescence intensity in every frame of each moving spot was measured, accumulated, and plotted in a histogram. Numerous studies have shown that truncated kinesin-1 motors are dimeric and active (Friedman & Vale, 1999; Tomishige et al, 2006; Lam et al, 2021), and kinesin-1 family is highly conserved in the motor domain. Hence, a truncated KIF5A motor (K490, amino acid 1–490) was generated and used as the standard for fluorescence intensity of dimeric motors. Moving KIF5A  $\Delta$ Exon27 molecules exhibit a much larger fraction of motors with high fluorescence intensities. The majority of moving KIF5A  $\Delta$ Exon27 spots consist of multiple motors. K490: repeated two times,  $n = 189$ ; other constructs are described in Fig. 4. Number of frames that have been analyzed: K490,  $n = 1,953$ ;  $\Delta$ C,  $n = 2,964$ ; WT,  $n = 1,634$ ; K998,  $n = 5,462$ ;  $\Delta$ Exon27,  $n = 8,345$ .
- B Two example traces of K490-EGFP showing photobleaching events. K490-EGFP was used as the standard dimer molecule to determine the fluorescent intensity of EGFP.
- C Histogram of measured intensities of moving K490-EGFP molecules that showed a single photobleaching step. The intensity distribution was fit with two Gaussian functions, resulting in mean values of  $145.5 \pm 3.6$  (mean  $\pm$  SD) and  $163.0 \pm 7.3$ . With an average background fluorescence signal of  $127.6 \pm 0.7$ , one obtains an average fluorescent intensity is 17.7 for EGFP (in a.u.).
- D, E Determination of the percentage of the number of motors for each motor complex. KIF5A K490 and KIF5A  $\Delta$ Exon27 are depicted here as examples (D). The same method was applied to the other motors. Each moving spot was assigned to a single intensity value that corresponded to the average intensity measured over the first 20 frames of the moving spot so the intensity would be less likely to be averaged down due to photobleaching. The measured values were then accumulated and plotted in a histogram. Based on the mean intensity of EGFP, the measured intensity values were sorted into intervals of 35.4 (depicted by the turquoise dashed lines), with the first interval centered at 163 ( $163 \pm 17.7$ ). The percentage of each bin was calculated and then assigned to the calculated number of dimers (E). The percentages of a single dimer for all KIF5A constructs are: K490, 100%;  $\Delta$ C, 88%; K998, 54%; WT, 54%;  $\Delta$ Exon27, 25%.

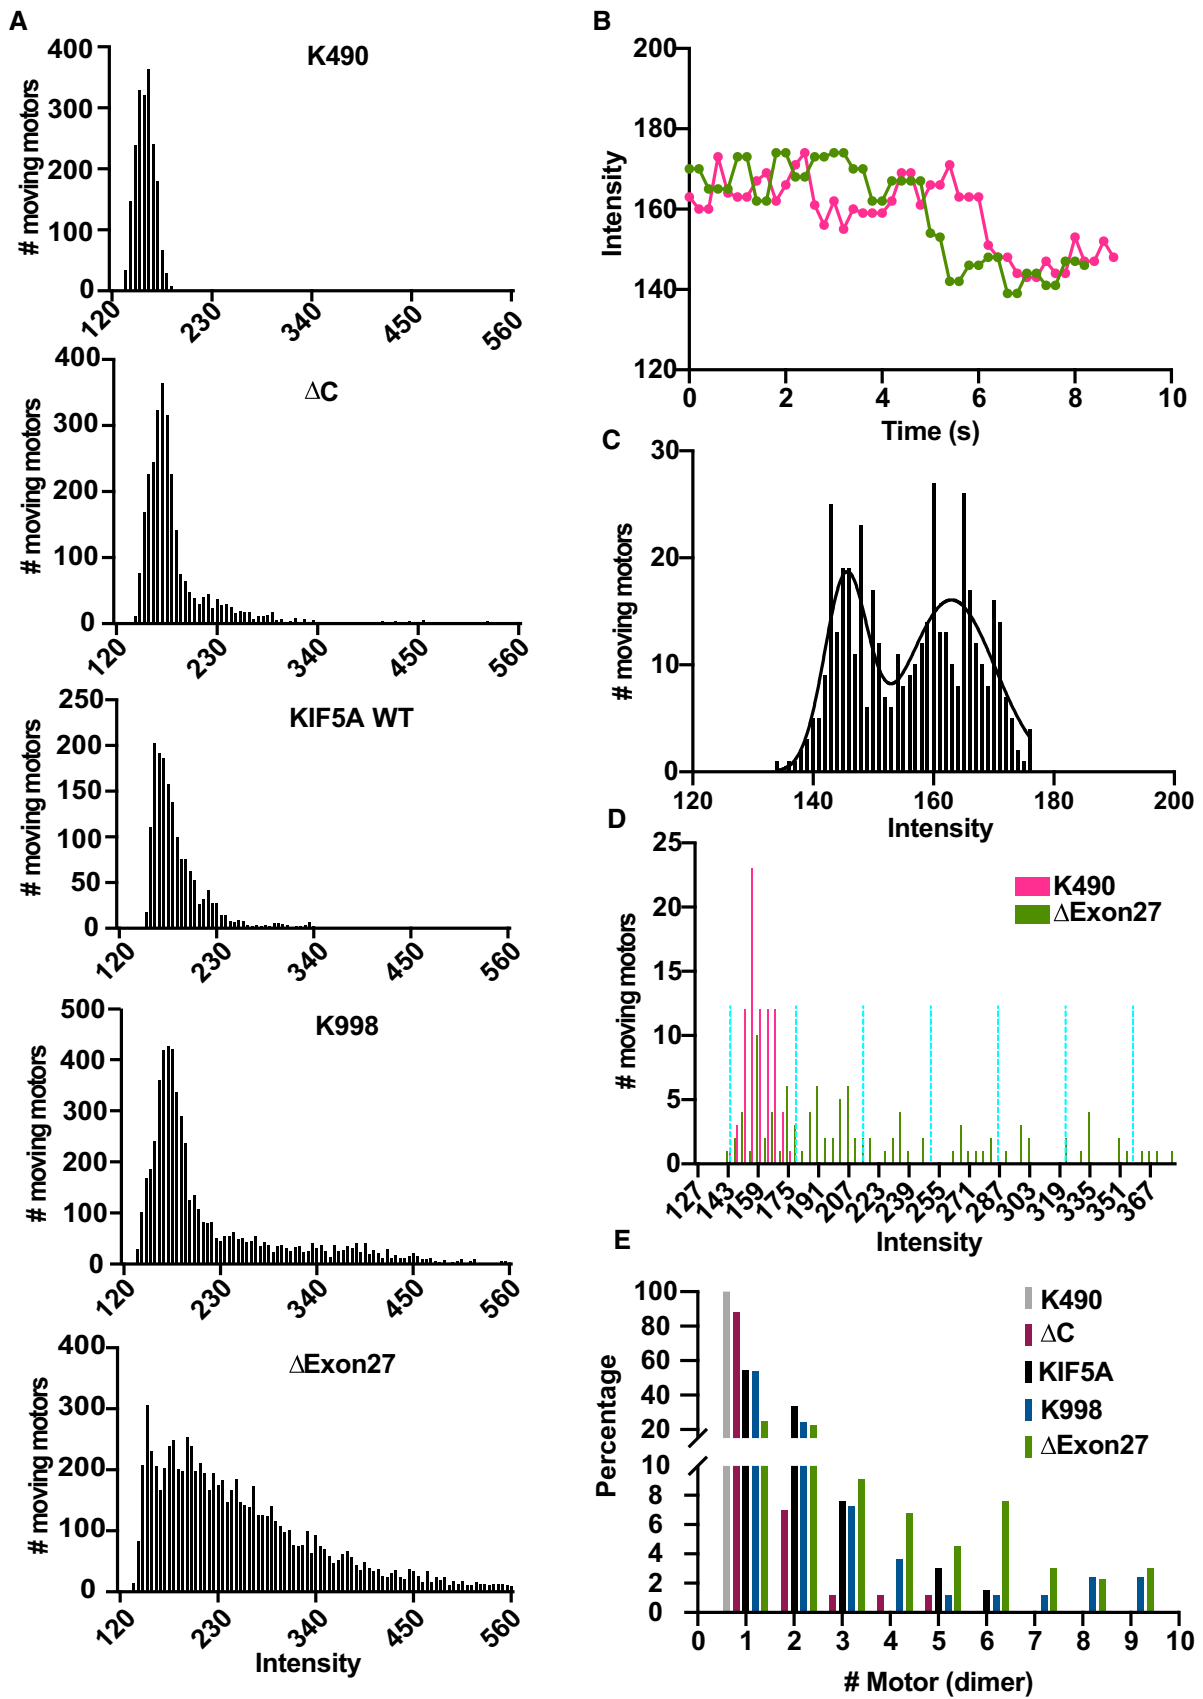

Figure EV4.

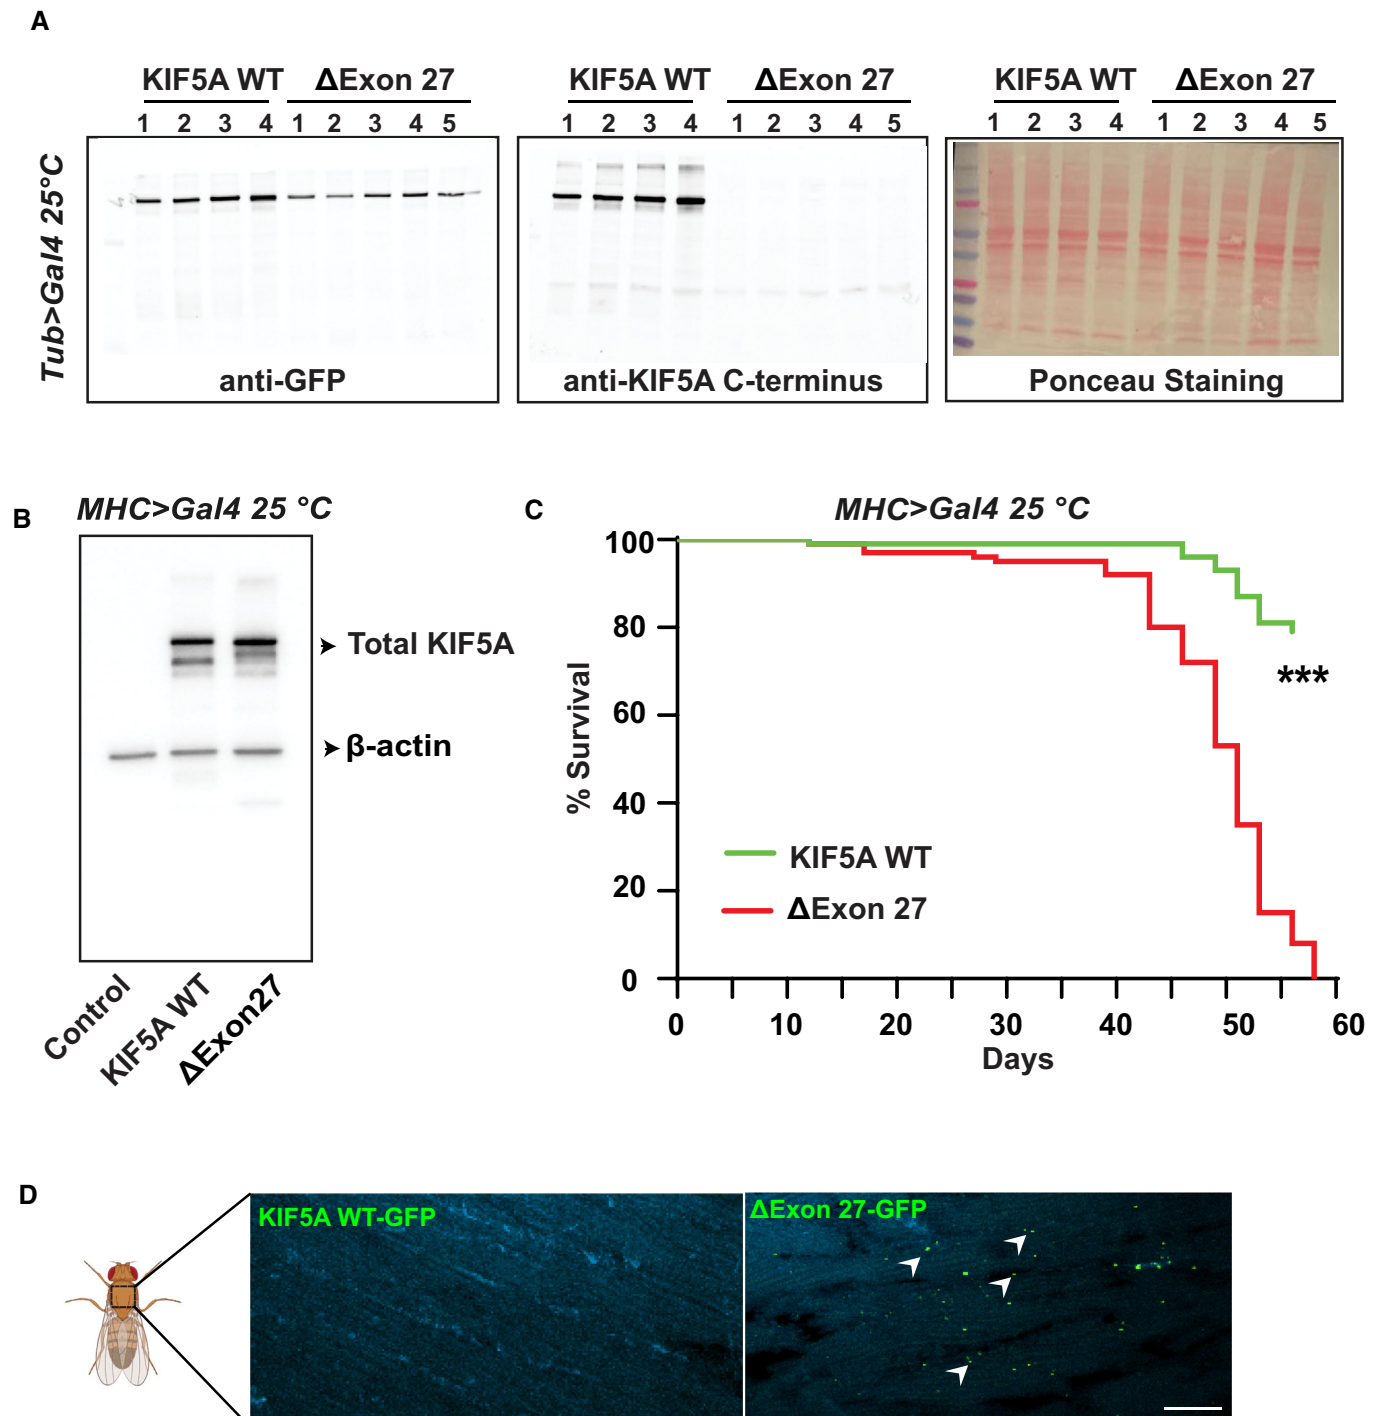

**Figure EV5. Muscle-specific expression of  $\Delta$ Exon27 in *Drosophila* leads to early lethality.**

**A** Western blot detecting the level of human KIF5A proteins in *Drosophila* ubiquitously expressing WT or  $\Delta$ Exon27 driven by tubulin-Gal4. Genotypes were: KIF5A WT (UAS-KIF5A WT-GFP/ tubulin-Gal4);  $\Delta$ Exon27 (UAS- $\Delta$ Exon27-GFP/ tubulin-Gal4). Samples from 4 (WT) and 5 ( $\Delta$ Exon27) different individual lines were assessed with similar results, two independent experiments.

**B** Western blot detecting the expression of human KIF5A proteins in *Drosophila* expressing WT or  $\Delta$ Exon27 in muscle tissues driven by MHC-Gal4. Genotypes were: Control (MHC-Gal4/+); KIF5A WT (UAS-KIF5A WT-GFP/MHC-Gal4);  $\Delta$ Exon27 (UAS- $\Delta$ Exon27-GFP/MHC-Gal4), two independent experiments.

**C** Lifespan of male flies expressing KIF5A WT or  $\Delta$ Exon27 in muscles driven by MHC-Gal4 at 25°C ( $n = 50$  flies per group, two independent experiment \*\*\* $P < 0.001$ , log-rank test).

**D** Aggregates accumulate in thorax muscles at 7 days post-eclosion in flies expressing  $\Delta$ Exon27, but not in those expressing KIF5A WT,  $n = 10$  flies per group. Scale bar: 10  $\mu$ m.
